# Supplementary material for: Memory effect in ferroelectric polyvinylidene fluoride (PVDF) films via spin crossover probes
Source: Royal Society of Chemistry journal article supplement (doi:10.1039/d4dt00220b), 2024-01-01
Supplement: d4dt00220b1.pdf [file d4dt00220b1.pdf]

### Supplementary information

## Memory effect in ferroelectric polyvinylidene fluoride (PVDF) films via spin crossover probes<sup>†</sup>

Yong Sung Koo<sup>a,#</sup> and Jose Ramon Galan-Mascaros<sup>\*a,c</sup>

**Table 1.** EDX data for three [Fe(NHtrz)<sub>3</sub>](NO)<sub>2</sub>/PVDF composite films normalized to O content.

|         | C     | O | F     | Fe   |
|---------|-------|---|-------|------|
| #1      | 24.77 | 1 | 10.02 | 3.72 |
| #2      | 23.70 | 1 | 8.81  | 3.70 |
| #3      | 24.98 | 1 | 9.40  | 3.73 |
| Average | 24.48 | — | 9.41  | 3.71 |

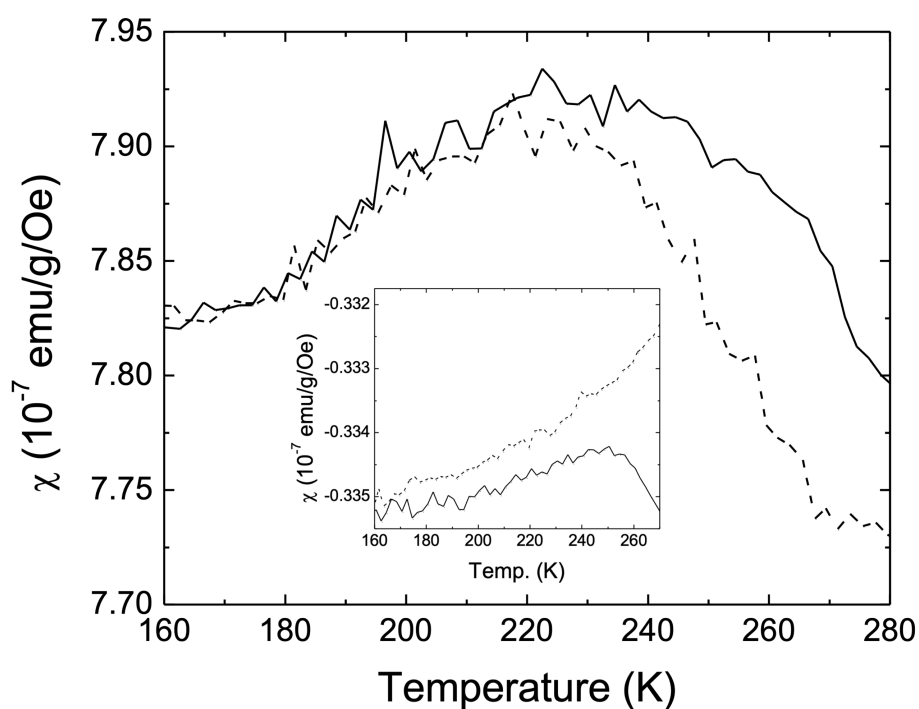

**Figure S1.** Magnetic susceptibility for [Fe(NH<sub>2</sub>trz)<sub>3</sub>](NO<sub>3</sub>)<sub>2</sub>/PVDF sample on heating (solid line) and cooling (dashed line) processes under a 7 T external magnetic field. Inset shows the magnetic susceptibility for the PVDF reference in the same conditions.
